# Supplementary material for: Antimicrobial and Anti-Inflammatory Activity of Apple Polyphenol Phloretin on Respiratory Pathogens Associated With Chronic Obstructive Pulmonary Disease
Source: PubMed Central journal article supplement (PMC8645934; doi:10.3389/fcimb.2021.652944), 2021-11-22
Supplement: DataSheet_1.pdf [file DataSheet_1.pdf]

# **Antimicrobial and anti-inflammatory activity of apple polyphenol phloretin on respiratory pathogens**

Rahel L. Birru, Kiflai Bein, Natalya Bondarchuk, Heather Wells, Qiao Lin, Y. Peter Di,  
George D. Leikauf

Supporting Information

**SUPPLEMENTAL TABLE 1**

| Category                                  | Name                                          | Supplier                                         | Catalog #            | Comments                                   |
|-------------------------------------------|-----------------------------------------------|--------------------------------------------------|----------------------|--------------------------------------------|
| Reagents                                  | Phloretin                                     | Cayman Chemicals<br>(Ann Arbor, MI)              | 14452                | Reconstituted in DMSO                      |
| Cell Culture                              | 75cm <sup>2</sup> Cell Culture Flask          | Corning Costar<br>(Tewksbury, MA)                | 3276                 |                                            |
|                                           | 96 well plates                                | Greiner Bio-One<br>(Austria)                     | 655180               |                                            |
|                                           | 12 well plates                                | Corning Costar                                   | 3513                 |                                            |
|                                           | NCI-H292 cells                                | ATCC (Manassas,<br>VA)                           | CRL-1848             |                                            |
|                                           | RAW 264.7 cells                               | ATCC                                             | TIB-71               |                                            |
|                                           | Normal Human Bronchial Epithelial (HBE) cells | MatTek (Ashland,<br>Massachusetts)               | NHBE-CRY             | Cultured on PureCol collagen-coated plates |
|                                           | COPD Human Bronchial Epithelial cells         | MatTek                                           | NHBE-CRY-DS          | Cultured on PureCol collagen-coated plates |
|                                           | Fetal Bovine Serum                            | Thermo Fisher Scientific (Waltham,<br>MA)        | 26140                |                                            |
|                                           | Penicillin Streptomycin 100X Solution         | GE Healthcare Life Sciences<br>(Marlborough, MA) | SV30010              |                                            |
|                                           | RPMI-1640                                     | ATCC                                             | 30-2001              | For NCI-H292 cell culture                  |
|                                           | Dulbecco's Modified Eagle's Medium (DMEM)     | Thermo Fisher Scientific                         | 11995-065            | For RAW 264.7 culture                      |
| Bronchial epithelial growth medium (BEGM) | Lifeline Cell Technology<br>(Oceanside, CA)   | LL-0023                                          | For HBE cell culture |                                            |

| Category          | Name                                              | Supplier                                             | Catalog #        | Comments                                                                                                                                                                                                                                                                                   |
|-------------------|---------------------------------------------------|------------------------------------------------------|------------------|--------------------------------------------------------------------------------------------------------------------------------------------------------------------------------------------------------------------------------------------------------------------------------------------|
| Cell Culture      | PureCol                                           | Advanced BioMatrix                                   | 5005             | PureCol was diluted 100 µg/mL (1:30) in water and incubated on plates/flasks for 2h (room temperature). Excess solution was removed and flasks/plates were dried overnight in a cell culture hood. Plates were exposed to UV light for 30 min and rinsed with BEGM before culturing cells. |
| Bacteria          | Nontypeable <i>Haemophilus influenzae</i> (NTHi)  | Provided by Dr. Hong Wei Chu, National Jewish Health | Clinical isolate | Strain 12, from middle ear infection                                                                                                                                                                                                                                                       |
|                   | <i>Moraxella catarrhalis</i>                      | ATCC                                                 | 25238            |                                                                                                                                                                                                                                                                                            |
|                   | <i>Streptococcus pneumoniae</i>                   | ATCC                                                 | 6303             |                                                                                                                                                                                                                                                                                            |
|                   | <i>Pseudomonas aeruginosa</i>                     | ATCC                                                 | BAA-47           |                                                                                                                                                                                                                                                                                            |
|                   | Brain Heart Infusion broth (BHI)                  | BD Biosciences (San Jose, CA)                        | 237500           |                                                                                                                                                                                                                                                                                            |
|                   | β-Nicotinamide adenine dinucleotide hydrate (NAD) | Sigma-Aldrich                                        | N1511            | -Added 100 mg NAD to 10 mL distilled water and filtered sterilized<br>-For sBHI, added 100 µL NAD preparation to 10 mL BHI                                                                                                                                                                 |
|                   | Hemin from Porcine                                | MP Biomedicals (Solon, OH)                           | 198820           | -Added 50 mg hemin to 5 mL 0.1 N NaOH, 5 mL ethylene glycol, 10 mL tris borate buffer, and 30 mL distilled water and filter sterilized<br>-For sBHI, added 10 µL of hemin preparation to 10 mL BHI                                                                                         |
|                   | Todd-Hewitt Broth (THB)                           | BD Biosciences                                       | 249240           |                                                                                                                                                                                                                                                                                            |
|                   | Yeast Extract                                     | Fisher Scientific (Hampton, NH)                      | BP9727           | For THY broth, added yeast extract to THB for a final concentration of 0.2%                                                                                                                                                                                                                |
| Tryptic Soy Broth | MP Biomedicals                                    | 1010717                                              |                  |                                                                                                                                                                                                                                                                                            |

| Category                            | Name                                                          | Supplier                         | Catalog #  | Comments                                                                                                                              |
|-------------------------------------|---------------------------------------------------------------|----------------------------------|------------|---------------------------------------------------------------------------------------------------------------------------------------|
| Bacteria                            | Chocolate II Agar (GC II Agar with Hemoglobin and IsoVitaleX) | BD Biosciences                   | B21267X    |                                                                                                                                       |
|                                     | Trypticase Soy Agar (TSA II) with Sheep Blood                 | BD Biosciences                   | B21239X    |                                                                                                                                       |
|                                     | Tryptic Soy Agar (TSA)                                        | MP Biomedicals                   | 1010617    |                                                                                                                                       |
|                                     | PBS                                                           | Thermo Fisher Scientific         | 10010023   |                                                                                                                                       |
| Bacterial Growth and Biofilm Assays | 96-Well Polystyrene Plates                                    | Fisher Scientific                | 12-565-501 | Used for bactericidal assays (plates were sterilized before use by UV light)                                                          |
|                                     | Flat Bottom Cell Culture Plates                               | Corning Costar                   | 3595       | Used for biofilm assays                                                                                                               |
|                                     | Crystal Violet                                                | Fisher Scientific                | C581       | Prepared 0.5% (w/v) solution: 0.125 g crystal violet powder to 5 mL methanol to solubilize and added 20 mL distilled H <sub>2</sub> O |
|                                     | DMEM - high glucose                                           | Sigma-Aldrich                    | D5671      | For PAO1 biofilm assay                                                                                                                |
|                                     | Gentamicin solution                                           | Sigma-Aldrich                    | G1272      |                                                                                                                                       |
|                                     | Saponin permeating solution, 0.5% w/v soln. in PBS (5X)       | Alfa Aesar (Haverhill, MA)       | J63209     | Diluted to 1X in PBS                                                                                                                  |
|                                     | Synergy 2 Plate Reader                                        | BioTek (Winooski, VT)            | 7131000    |                                                                                                                                       |
| ELISA                               | LPS from Pseudomonas aeruginosa 10                            | Sigma-Aldrich                    | L8643      |                                                                                                                                       |
|                                     | Mouse TNF- $\alpha$ ELISA MAX Deluxe                          | BioLegend (San Diego, CA)        | 430904     |                                                                                                                                       |
|                                     | Stop Solution for TMB Substrate                               | BioLegend                        | 423001     |                                                                                                                                       |
| RT-qPCR                             | TRI Reagent                                                   | Sigma-Aldrich                    | 93289      |                                                                                                                                       |
|                                     | iScript cDNA Synthesis Kit                                    | Bio-Rad (Hercules, CA)           | 1708891    |                                                                                                                                       |
|                                     | TaqMan gene expression master mix                             | Life Technologies (Carlsbad, CA) | 4369016    |                                                                                                                                       |

| Category           | Name                                             | Supplier                                          | Catalog #                                       | Comments                                                                                                        |
|--------------------|--------------------------------------------------|---------------------------------------------------|-------------------------------------------------|-----------------------------------------------------------------------------------------------------------------|
| RT-qPCR            | TaqMan Gene Expression Assay: RPL32              | Life Technologies                                 | Hs00851655_g1                                   |                                                                                                                 |
|                    | TaqMan Gene Expression Assay: IL6                | Life Technologies                                 | Hs00174131_m1                                   |                                                                                                                 |
|                    | TaqMan Gene Expression Assay: CCL20              | Life Technologies                                 | Hs00355476_m1                                   |                                                                                                                 |
|                    | TaqMan Gene Expression Assay: IL8                | Life Technologies                                 | Hs00174103_m1                                   |                                                                                                                 |
|                    | ABI 7900HT                                       | Applied Biosystems (Foster City, CA)              | 4351405                                         |                                                                                                                 |
| Cytotoxicity Assay | CytoTox-ONE Homogeneous Membrane Integrity Assay | Promega (Madison, WI)                             | G7890                                           |                                                                                                                 |
| Animal Trials      | FVB/NJ mice                                      | Jackson Laboratory (Bar Harbor, ME)               | 001800                                          |                                                                                                                 |
|                    | Rodent Diet                                      | Envigo (Huntingdon, United Kingdom)               | Standard: TD.94045, 0.157% phloretin: TD.190074 | AIN-93G purified diet was ordered with and without phloretin. Diet was administered within 2 weeks of delivery. |
|                    | Euthasol                                         | Virbac AH, Incorporated (Fort Worth, TX)          | 200-071                                         |                                                                                                                 |
|                    | Mouse Magnetic Luminex Assay                     | Research And Diagnostic Systems (Minneapolis, MN) | LXSAMSM                                         | CXCL1 was measured in BAL fluid                                                                                 |
|                    | Bio-Plex 200 System                              | Bio-Rad                                           |                                                 |                                                                                                                 |
| Software           | SigmaPlot 11                                     | Systat Software (San Jose, CA)                    | Not applicable                                  |                                                                                                                 |
|                    | GraphPad Prism 8                                 | GraphPad Software, Inc. (La Jolla, CA)            | Not applicable                                  |                                                                                                                 |

**SUPPLEMENTAL TABLE 2: Growth Conditions of Bacteria**

|                                    | <b>Growth Conditions</b>                                                                                                                                                                                                                                                                 | <b>Medium for Microtitre Antibacterial Growth Assays (Figure 1A)</b> | <b>Medium for Biofilm Assays (Figure 1B)</b> | <b>Medium for Cell Coculture Assays (Figure 1C, Figure 2)</b> | <b>Agar plates used to confirm experimental doses</b> |
|------------------------------------|------------------------------------------------------------------------------------------------------------------------------------------------------------------------------------------------------------------------------------------------------------------------------------------|----------------------------------------------------------------------|----------------------------------------------|---------------------------------------------------------------|-------------------------------------------------------|
| <b>NTHi</b>                        | Chocolate agar <ul style="list-style-type: none"> <li>• 37°C, 5% CO<sub>2</sub> (15h)</li> <li>• Single colonies added to indicated medium for subsequent experiments</li> <li>• OD<sub>600</sub> measured to adjust dose</li> </ul>                                                     | BHI supplemented with hemin and NAD (sBHI)                           | sBHI                                         | NCI-H292: 20% sBHI in RPMI; RAW 264.7: DMEM; HBE: BEBM        | Chocolate agar                                        |
| <b><i>M. catarrhalis</i></b>       | Chocolate agar <ul style="list-style-type: none"> <li>• 37°C, 5% CO<sub>2</sub> (15h)</li> <li>• Single colonies added to indicated medium for subsequent experiments</li> <li>• OD<sub>600</sub> measured to adjust dose</li> </ul>                                                     | THB                                                                  | THB                                          | RAW 264.7: DMEM                                               | Chocolate agar                                        |
| <b><i>S. pneumoniae</i></b>        | Sheep blood agar <ul style="list-style-type: none"> <li>• 37°C, 5% CO<sub>2</sub> (15h)</li> <li>• Single colonies added to indicated medium for subsequent experiments</li> <li>• OD<sub>600</sub> measured to adjust dose</li> </ul>                                                   | THB supplemented with 0.2% yeast (THY)                               | THB                                          | RAW 264.7: DMEM                                               | Sheep blood agar                                      |
| <b><i>P. aeruginosa</i> (PAO1)</b> | TSB <ul style="list-style-type: none"> <li>• 37°C, shaking (15h)</li> <li>• Subcultured in fresh TSB (37°C, shaking)</li> <li>• Pelleted (4000 RCF, 5 min) and resuspended in indicated medium for subsequent experiments</li> <li>• OD<sub>600</sub> measured to adjust dose</li> </ul> | 20% TSB in PBS                                                       | DMEM                                         | RAW 264.7: DMEM                                               | Tryptic soy agar                                      |

**Abbreviations:** BEBM, Bronchial epithelial basal medium; BHI, brain heart infusion broth; *M. catarrhalis*, *Moraxella catarrhalis*; NAD,  $\beta$ -nicotinamide adenine dinucleotide hydrate; NTHi, nontypeable *Haemophilus influenzae*, *P. aeruginosa*, *Pseudomonas aeruginosa*; *S. pneumoniae*, *Streptococcus pneumoniae*; THB, Todd Hewitt broth; TSB, tryptic soy broth

**SUPPLEMENTAL TABLE 3: Manual CFU Enumeration of *Streptococcus Pneumoniae* Microtitre Assay Growth Curve**

|                             | <b><i>S. pneumoniae</i><br/>(18h)</b>                                                      | <b>%</b> |
|-----------------------------|--------------------------------------------------------------------------------------------|----------|
| Vehicle<br>1 mM Phloretin   | 3.5x10 <sup>3</sup> (±1.7x10 <sup>3</sup> )<br>0.0 (±0.0)                                  | -100%    |
| Vehicle<br>0.3 mM Phloretin | 4.9x10 <sup>3</sup> (±2.6x10 <sup>3</sup> )<br>1.8x10 <sup>5</sup> (±9.3x10 <sup>4</sup> ) | +3571%   |
| Vehicle<br>0.1 mM Phloretin | 1.1x10 <sup>4</sup> (±3.0x10 <sup>3</sup> )<br>1.1x10 <sup>4</sup> (±3.0x10 <sup>3</sup> ) | +109%    |

**Supplemental Table 3: Confirmation of *Streptococcus pneumoniae* (*S. pneumoniae*) microtitre assays.** Microtitre results from the *S. pneumoniae* microtitre assays were confirmed by plating the treated bacteria from the assays (18 h) on sheep blood agar plates and manually counting the CFU. The percent change (%) in the antibacterial effect of phloretin relative to the vehicle control is presented. Results are the means ± SEM of 3 independent trials with 3 replicates per condition tested within each trial ( $n=9$ ). *P* values were assessed by paired t-test.



## SUPPLEMENTAL FIGURE 1

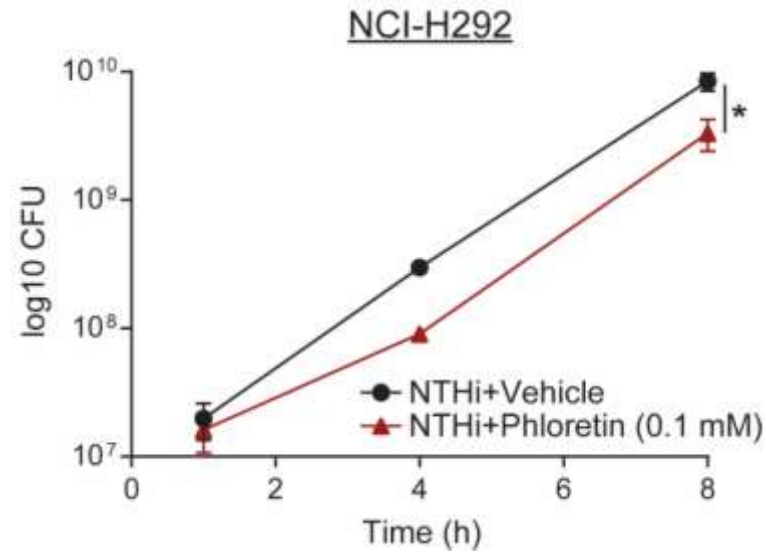

**Supplemental Figure 1: Phloretin inhibits NTHi growth and adherence of NCI-H292 cells in a time-dependent manner.** NCI-H292 cells were pretreated with vehicle or 0.1 mM phloretin and exposed to 500  $\mu$ L of  $3 \times 10^4$  CFU/mL NTHi for 1, 4, and 8 h (37 °C, 5% CO<sub>2</sub>). Cells were lysed to collect adherent bacteria. Bacteria were enumerated in each collection by plating dilutions on chocolate agar plates and counting the CFU. Data are the means  $\pm$  SEM. Data are representative of 2 independent trials with 3 replicates per condition tested within each trial ( $n=6$ ). The  $P$  value was assessed by two-way ANOVA.

## SUPPLEMENTAL FIGURE 2

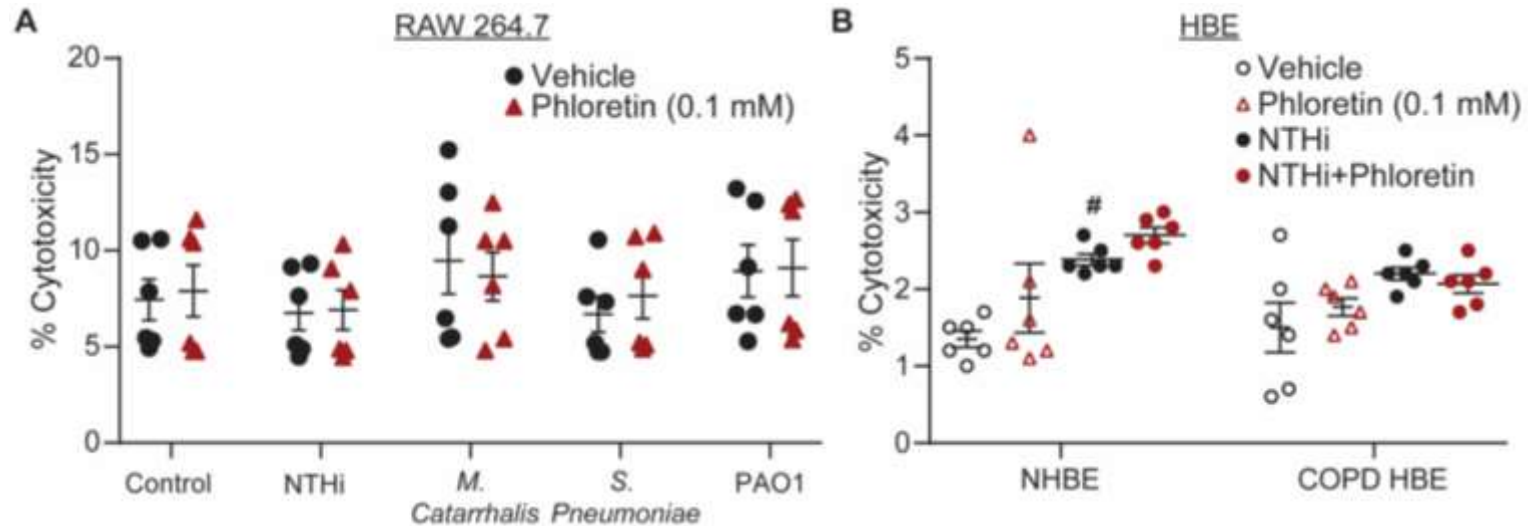

**Supplemental Figure 2: Phloretin does not induce cytotoxicity in RAW 264.7 or human bronchial epithelial (HBE) cells. A.** RAW 264.7 cells were pretreated with 0.1 mM phloretin (1 h) and exposed to medium control or NTHi ( $2 \times 10^5$  CFU/mL, 50  $\mu$ L), *M. catarrhalis* ( $2 \times 10^5$  CFU, 50  $\mu$ L), *S. pneumoniae* ( $2 \times 10^5$  CFU, 50  $\mu$ L), or PAO1 ( $2 \times 10^5$ , 50  $\mu$ L). **B.** HBE cells were pretreated with 0.1 mM phloretin (1 h) and exposed to medium control or NTHi ( $1.5 \times 10^7$  CFU/mL, 500  $\mu$ L). Cytotoxicity was determined by measuring lactate dehydrogenase release. Results are expressed as percent cytotoxicity relative to a maximum release lactate dehydrogenase control. Data are the means  $\pm$  SEM. Data are representative of 2 independent trials with 3 replicates per condition tested within each trial ( $n=6$ ). *P* values were assessed by one-way ANOVA followed by Tukey's multiple comparisons test to compare vehicle to vehicle+pathogen treated cells and to compare vehicle to phloretin treated cells for each condition. #Significantly different from vehicle+medium control treated cells ( $P<0.05$ ).
